# Supplementary material for: Graphene–silicon-on-insulator (GSOI) Schottky diode photodetectors
Source: Royal Society of Chemistry journal article supplement (doi:10.1039/c8nr05285a), 2018-01-01
Supplement: c8nr05285a1.pdf [file c8nr05285a1.pdf]

# Graphene-Silicon-On-Insulator (GSOI) Schottky Diode Photodetectors

H. Selvi<sup>1</sup>, E.W. Hill<sup>2,4</sup>, P. Parkinson<sup>3,5</sup>, and T.J. Echtermeyer<sup>1,2,3\*</sup>

<sup>1</sup>*School of Electrical & Electronic Engineering,*

*University of Manchester, Manchester M13 9PL, UK*

<sup>2</sup>*National Graphene Institute, University of Manchester, Manchester M13 9PL, UK*

<sup>3</sup>*Photon Science Institute, University of Manchester, Manchester M13 9PL, UK*

<sup>4</sup>*Manchester Centre For Mesoscience and Nanotechnology,*

*University of Manchester, Manchester M13 9PL, UK and*

<sup>5</sup>*School of Physics and Astronomy, University of Manchester, Manchester M13 9PL, UK*

## Supporting Information

### I. RAMAN CHARACTERIZATION

After completion of the fabrication process, Raman spectroscopy was carried out to investigate the quality of graphene on the devices using a Renishaw InVia instrument ( $\lambda = 532\text{nm}$ ). Fig.1a) and Fig.1b) show the Raman spectra of graphene on the oxide frame and in the silicon window of the GSOI-planar and GSOI-grating device, respectively. The sharpness of the 2D peaks and the high ratio of 2D to G peak intensities ( $I_{2D/G}$ ) in the spectra indicate the high quality of monolayer graphene[1]. A negligible D peak observed at  $\sim 1344\text{cm}^{-1}$  in Fig.1a) is indicative of the presence of a small amount of defects, presumably due to CVD-graphene transfer. Graphene in the silicon window exhibit an additional broad peak appearing around  $\sim 1430\text{cm}^{-1}$  which originates from the silicon substrate[2].

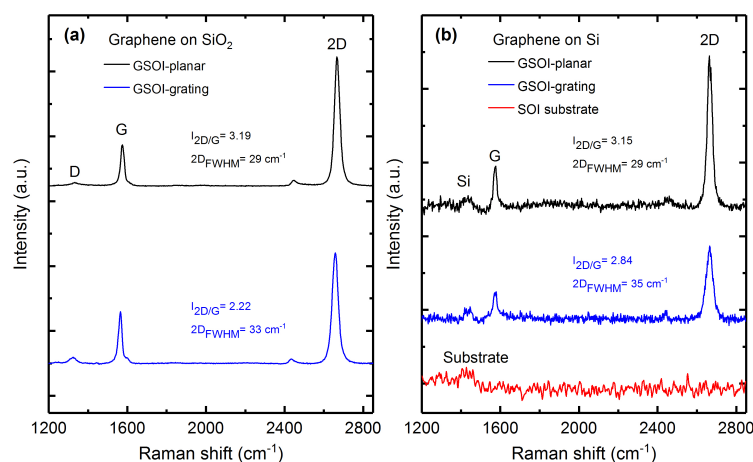

FIG. 1: Raman spectrum of graphene on the GSOI-planar and GSOI-grating devices after completion of the fabrication process. a) Raman spectrum of graphene on the SiO<sub>2</sub> frame. b) Raman spectrum of graphene in the silicon window together with the spectrum of the SOI substrate surface without graphene.

\*Electronic address: [tim.echtermeyer@manchester.ac.uk](mailto:tim.echtermeyer@manchester.ac.uk)

## II. SURFACE TOPOGRAPHY

Surface topography of the GSOI-grating device examined with surface profilometry (Dektak). Fig2 shows approximately  $3\mu\text{m}$  deep and  $5.5\mu\text{m}$  wide inverted pyramids with (111) facets separated by un-etched planar (100) lines of  $\sim 3\mu\text{m}$  width. The asymmetry in the profile is due to tip convolution with the structured surface.

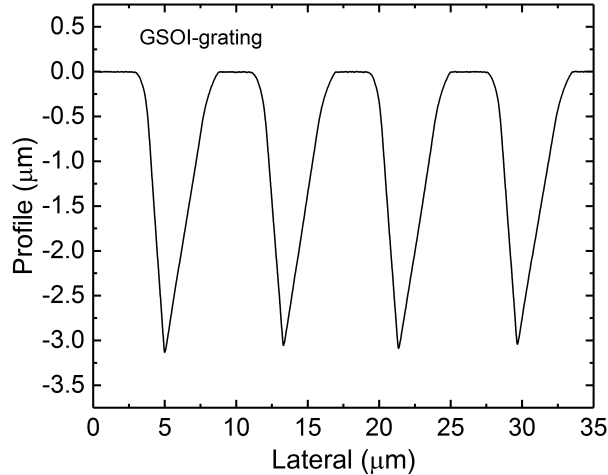

FIG. 2: Surface topography of GSOI-grating device measured with a profilometer.

## III. I-V CHARACTERISATION

Experimentally observed I-V curves can be described by the Shockley equation [3].

$$I = I_0 \left[ \exp \left( \frac{q(V - IR_S)}{nk_B T} \right) - 1 \right] \quad (1)$$

with

$$I_0 = AA^* T^2 \exp \left( \frac{-q\phi_B}{k_B T} \right) \quad (2)$$

$V$  is the applied bias voltage,  $R_S$  is the series resistance of the diode,  $n$  is the diode ideality factor,  $k_B$  is the Boltzmann constant,  $q$  the electron charge, and  $T$  is the temperature in Kelvin.  $I_0$  is the saturation current or leakage current under reverse bias, where,  $A$  is the Schottky diode contact area,  $A^*$  is the effective Richardson constant ( $112\text{A}^{-2}\text{K}^{-2}$  for n-type silicon) and  $\phi_B$  is the Schottky barrier height (SBH) for a given voltage.

The forward bias region of the J-V curves taken in the dark were least-squares fitted with eq.1 in order to extract the ideality factor ( $n$ ), series resistance ( $R_S$ ) and saturation current ( $I_0$ ) of the devices.

## IV. OPTICAL SIMULATIONS

Optical simulations were carried out with COMSOL employing the Wave Optics Module. A unit cell of the GSOI-grating device based on a total width of  $8.5\mu\text{m}$  ( $w_{\text{groove}} = 5.5\mu\text{m} + w_{\text{flat}} = 3\mu\text{m}$ ) and active silicon height  $t_{\text{Si}} = 10\mu\text{m}$ , BOX height  $t_{\text{BOX}} = 1\mu\text{m}$ , handle silicon height  $t_{\text{Si-handle}} = 10\mu\text{m}$  and air as incident

medium was utilized as material stack into which the V-groove has been modeled. Periodic boundary conditions were enforced on the left and right hand side of the geometry respectively. The refractive index of silicon was chosen from ref.[4] and the refractive index of SiO<sub>2</sub> set to  $n_{\text{SiO}_2} = 1.47$ . The GSOI-planar device is based on the same geometry, excluding the V-groove.

- 
- [1] A.C. Ferrari, J.C. Meyer, V. Scardaci, C. Casiraghi, M. Lazzeri, F. Mauri, S. Piscanec, D. Jiang, K.S. Novoselov, S. Roth, A.K. Geim, *Phy. Rev. Lett.*, **97**, 187401 (2006)
  - [2] M. Casalino, U. Sassi, I. Goykhman, A. Eiden, E. Lidorikis, S. Milana, D. De Fazio, F. Tomarchio, M. Iodice, G. Coppola, A.C. Ferrari, *ACS Nano* **11**, 10955 (2017)
  - [3] S.M. Sze, K.K. Ng, *Physics of semiconductor devices* John Wiley & Sons, 2007.
  - [4] M.A. Green, *Sol Energ Mat Sol C* **92**, 1305 (2008)
